# Supplementary material for: Phospho-regulated tethering of focal adhesion kinase to vinculin links force transduction to focal adhesion signaling
Source: Research Square preprint supplement (doi:10.21203/rs.3.rs-5617152/v1), 2025-01-23
Supplement: Supplementary file 1 [file 559c350fa73b22a2f964d2b7.pdf]

## Supplemental information

**Supplementary Table S1: Paxillin peptides used in the study.**

|       |                                                           |
|-------|-----------------------------------------------------------|
| LD1   | MDDL DALLADLES                                            |
| LD2   | SNLSELDRLLELNAVQHN                                        |
| LD3   | SVESLLDELES                                               |
| LD4   | SATRELDELMASLSD                                           |
| LD5   | SQLDSMLGSLQSD                                             |
| LD2/4 | SNLSELDRLLELNAVQHNGSGSGSGSGSGSGSGSGSGSGSGGSATRELDELMASLSD |

For anisotropy experiments peptides were labelled N-terminally with FITC. The non-native linker region connecting LD2 and LD4 sequences in peptide LD2/4 is in italic.

**Supplementary Table S2. Crystallographic data collection and refinement statistics**

| <i>Vinculin-T+LD1+LD2</i>                 |                         |
|-------------------------------------------|-------------------------|
| <b>Data collection</b>                    |                         |
| X-ray source                              | ALBA, BL13-XALOC        |
| Wavelength (Å)                            | 0.97926                 |
| Space group                               | C2                      |
| Cell dimensions                           |                         |
| a, b, c (Å)                               | 177.38, 70.56, 117.37   |
| α, β, γ (°)                               | 90, 131.25, 90          |
| Resolution (Å)                            | 44.83-2.55 (2.69-2.55)* |
| Total reflections                         | 109790 (16149)          |
| Multiplicity                              | 3.1 (3.1)               |
| Unique reflections                        | 35621 (5168)            |
| Completeness (%)                          | 99.6 (99.9)             |
| R <sub>merge</sub> (%)                    | 10.1 (85.6)             |
| R <sub>meas</sub> (%)                     | 12.4 (103.5)            |
| R <sub>pim</sub> (%)                      | 6.9 (57.5)              |
| CC(1/2)                                   | 99.5 (61.1)             |
| I / σI                                    | 7.3 (1.4)               |
| <b>Refinement</b>                         |                         |
| Resolution (Å)                            | 44.87-2.54              |
| Reflections (total/test set)              | 34219/1677              |
| R <sub>work</sub> / R <sub>free</sub> (%) | 22.5/25.9               |
| No. atoms                                 | 5926                    |
| Protein                                   | 5745                    |
| Solvent                                   | 101                     |
| Other                                     | 80                      |
| R.m.s. deviations                         |                         |
| Bond lengths (Å)                          | 0.005                   |
| Bond angles (°)                           | 0.996                   |
| mean B value (Å <sup>2</sup> )            | 70.1                    |

\*Values in parentheses are for highest-resolution shell.

## Supplementary Figures:

**Figure S1:**

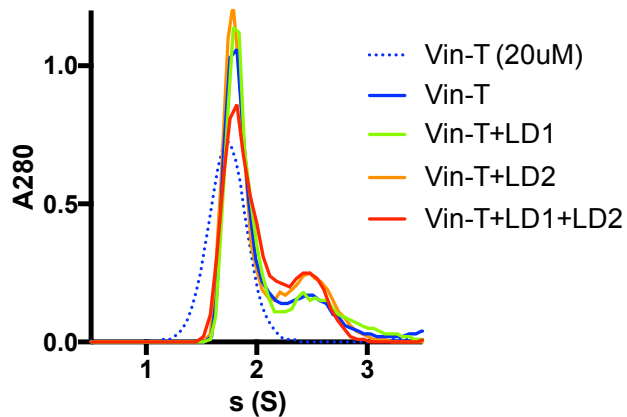

Sedimentation velocity analytical ultracentrifugation (svAUC) analysis of vinculin tail (Vin-T) alone or bound to LD1 and/or LD2. Measurements are performed at 100  $\mu$ M Vin-T and LD1/LD2 unless indicated. At 20  $\mu$ M Vin-T appears as a homogenous monomer, while at 100  $\mu$ M approximately 20% of Vin-T forms a dimer. Formation of Vin-T dimers or higher oligomers are not significantly affected by the presence of LD1 and/or LD2.

**Figure S2:**

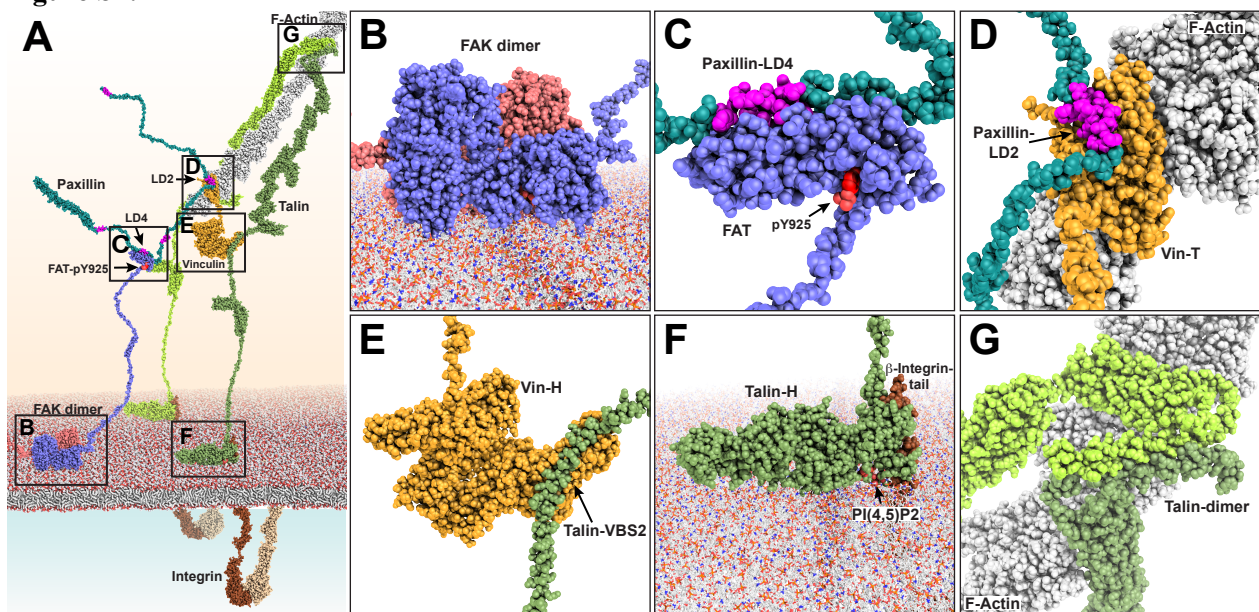

Atomic model of FAK force activation. **(A)** Atomic model as in Fig. 6A. Boxed are regions based on high-resolution structures, which are shown enlarged in panels B-G. Coloring as in Fig. 6A. **(B)** Symmetric FAK dimer bound via FERM and kinase domains to the membrane with the kinase active site facing the membrane as in PDB 6TY4 (Acebrón *et al*, 2020). **(C)** Paxillin LD4 bound to the H23 site in FAT, as in 1OW7 (Hoellerer *et al*, 2003). Y925 (red) is modelled in a phosphorylated state resulting in an unbound H14 site. **(D)** Paxillin LD2 bound to Vin-T as reported in this study (Fig. 5C right panel) and Vin-T bound to actin as in 3JBI (Kim *et al*, 2016). **(E)** Vin-H bound to talin VBS2 as in 1U6H (Fillingham *et al*, 2005). **(F)** The talin head (H) domain is bound to the membrane lipid PI(4,5)P2 as in 6MFS (Chinthalapudi *et al*, 2018) and to the  $\beta$ 3-integrin tail as in 1MIZ (Garcia-Alvarez *et al*, 2003) and 2H7E (Wegener *et al*, 2007). **(G)** Talin C-terminal helices are dimerized as in 2QDQ (Gingras *et al*, 2008) and the talin rod domain R13 modelled bound to actin, loosely based on the low resolution structure in (Gingras *et al*, 2008).

## References

- Acebrón I, Righetto RD, Schoenherr C, de Buhr S, Redondo P, Culley J, Rodriguez CF, Daday C, Biyani N, Llorca O *et al* (2020) Structural basis of Focal Adhesion Kinase activation on lipid membranes. *EMBO J* 39: e104743
- Chinthalapudi K, Rangarajan ES, Izzard T (2018) The interaction of talin with the cell membrane is essential for integrin activation and focal adhesion formation. *Proc Natl Acad Sci U S A* 115: 10339-10344
- Fillingham I, Gingras AR, Papagrigoriou E, Patel B, Emsley J, Critchley DR, Roberts GC, Barsukov IL (2005) A vinculin binding domain from the talin rod unfolds to form a complex with the vinculin head. *Structure* 13: 65-74
- Garcia-Alvarez B, de Pereda JM, Calderwood DA, Ulmer TS, Critchley D, Campbell ID, Ginsberg MH, Liddington RC (2003) Structural determinants of integrin recognition by talin. *Mol Cell* 11: 49-58
- Gingras AR, Bate N, Goult BT, Hazelwood L, Canestrelli I, Grossmann JG, Liu H, Putz NS, Roberts GC, Volkmann N *et al* (2008) The structure of the C-terminal actin-binding domain of talin. *EMBO J* 27: 458-469
- Hoellerer MK, Noble ME, Labesse G, Campbell ID, Werner JM, Arold ST (2003) Molecular recognition of paxillin LD motifs by the focal adhesion targeting domain. *Structure* 11: 1207-1217
- Kim LY, Thompson PM, Lee HT, Pershad M, Campbell SL, Alushin GM (2016) The Structural Basis of Actin Organization by Vinculin and Metavinculin. *J Mol Biol* 428: 10-25
- Wegener KL, Partridge AW, Han J, Pickford AR, Liddington RC, Ginsberg MH, Campbell ID (2007) Structural basis of integrin activation by talin. *Cell* 128: 171-182
